# Supplementary material
Source: HighWire-hosted journal article supplement (https://www.jrheum.org/highwire/filestream/31231/field_highwire_adjunct_files/0/161219DataSuppl.pdf)

**ONLINE SUPPLEMENTARY DATA**

**Supplementary Table 1.** Absolute number of musculoskeletal disorders-related mortality and proportion from all causes deaths by sex and year. Numbers in parentheses show the percentage (%) from all causes deaths.

| Year | Underlying cause of death |          |          |                 | Multiple cause (any mention) |           |           |                 | Underlying/multiple cause ratio |       |      |
|------|---------------------------|----------|----------|-----------------|------------------------------|-----------|-----------|-----------------|---------------------------------|-------|------|
|      | Men                       | Women    | All      | Women:men ratio | Men                          | Women     | All       | Women:men ratio | Men                             | Women | All  |
| 1998 | 22 (0.4)                  | 54 (0.9) | 76 (0.6) | 2.5             | 108 (1.8)                    | 217 (3.6) | 325 (2.7) | 2.0             | 0.20                            | 0.25  | 0.23 |
| 1999 | 19 (0.3)                  | 58 (0.9) | 77 (0.6) | 3.1             | 98 (1.7)                     | 238 (3.8) | 336 (2.8) | 2.4             | 0.19                            | 0.24  | 0.23 |
| 2000 | 13 (0.2)                  | 52 (0.8) | 65 (0.5) | 4.0             | 100 (1.7)                    | 230 (3.7) | 330 (2.8) | 2.3             | 0.13                            | 0.23  | 0.20 |
| 2001 | 19 (0.3)                  | 47 (0.7) | 66 (0.6) | 2.5             | 102 (1.8)                    | 221 (3.5) | 323 (2.7) | 2.2             | 0.19                            | 0.21  | 0.20 |
| 2002 | 21 (0.4)                  | 53 (0.8) | 74 (0.6) | 2.5             | 109 (1.9)                    | 227 (3.6) | 336 (2.8) | 2.1             | 0.19                            | 0.23  | 0.22 |
| 2003 | 20 (0.4)                  | 50 (0.8) | 70 (0.6) | 2.5             | 105 (1.9)                    | 234 (3.8) | 339 (2.9) | 2.2             | 0.19                            | 0.21  | 0.21 |
| 2004 | 18 (0.3)                  | 48 (0.8) | 66 (0.6) | 2.7             | 107 (1.9)                    | 221 (3.6) | 328 (2.8) | 2.1             | 0.17                            | 0.22  | 0.20 |
| 2005 | 16 (0.3)                  | 58 (0.9) | 74 (0.6) | 3.6             | 90 (1.6)                     | 221 (3.6) | 311 (2.7) | 2.5             | 0.18                            | 0.26  | 0.24 |
| 2006 | 15 (0.3)                  | 41 (0.7) | 56 (0.5) | 2.7             | 89 (1.6)                     | 220 (3.7) | 309 (2.7) | 2.5             | 0.17                            | 0.19  | 0.18 |
| 2007 | 24 (0.4)                  | 46 (0.8) | 70 (0.6) | 1.9             | 105 (1.8)                    | 210 (3.4) | 315 (2.7) | 2.0             | 0.23                            | 0.22  | 0.22 |
| 2008 | 9 (0.2)                   | 45 (0.7) | 54 (0.5) | 5.0             | 93 (1.6)                     | 231 (3.8) | 324 (2.7) | 2.5             | 0.10                            | 0.19  | 0.17 |
| 2009 | 19 (0.4)                  | 38 (0.6) | 57 (0.5) | 2.0             | 103 (1.9)                    | 240 (4.0) | 343 (3.0) | 2.3             | 0.18                            | 0.16  | 0.17 |
| 2010 | 17 (0.3)                  | 53 (0.9) | 70 (0.6) | 3.1             | 100 (1.8)                    | 270 (4.5) | 370 (3.1) | 2.7             | 0.17                            | 0.20  | 0.19 |
| 2011 | 22 (0.4)                  | 43 (0.7) | 65 (0.6) | 2.0             | 113 (2.0)                    | 245 (4.2) | 358 (3.1) | 2.2             | 0.19                            | 0.18  | 0.18 |
| 2012 | 18 (0.3)                  | 46 (0.7) | 64 (0.5) | 2.6             | 124 (2.1)                    | 270 (4.2) | 394 (3.2) | 2.2             | 0.15                            | 0.17  | 0.16 |
| 2013 | 10 (0.2)                  | 39 (0.6) | 49 (0.4) | 3.9             | 101 (1.8)                    | 227 (3.6) | 328 (2.7) | 2.2             | 0.10                            | 0.17  | 0.15 |
| 2014 | 21 (0.4)                  | 52 (0.9) | 73 (0.6) | 2.5             | 105 (1.9)                    | 258 (4.3) | 363 (3.1) | 2.5             | 0.20                            | 0.20  | 0.20 |

**Supplementary Table 2.** Absolute number of rheumatoid arthritis-related mortality and proportion from all causes deaths by sex and year. Numbers in parentheses show the percentage (%) from all causes deaths.

| Year | Underlying cause of death |          |          |                 | Multiple cause (any mention) |          |                 |     | Underlying/multiple cause ratio |      |      |
|------|---------------------------|----------|----------|-----------------|------------------------------|----------|-----------------|-----|---------------------------------|------|------|
|      | Men                       | Women    | All      | Women:men ratio | Men                          | Women    | Women:men ratio | Men | Women                           | All  |      |
| 1998 | 3 (0.05)                  | 21 (0.4) | 24 (0.2) | 7.0             | 24 (0.4)                     | 80 (1.3) | 104 (0.9)       | 3.3 | 0.13                            | 0.26 | 0.23 |
| 1999 | 6 (0.1)                   | 22 (0.4) | 28 (0.2) | 3.7             | 19 (0.3)                     | 85 (1.3) | 104 (0.9)       | 4.5 | 0.32                            | 0.26 | 0.27 |
| 2000 | 1 (0.02)                  | 21 (0.3) | 22 (0.2) | 21              | 28 (0.5)                     | 85 (1.4) | 113 (0.9)       | 3.0 | 0.04                            | 0.25 | 0.19 |
| 2001 | 5 (0.09)                  | 19 (0.3) | 24 (0.2) | 3.8             | 19 (0.3)                     | 69 (1.1) | 88 (0.7)        | 3.6 | 0.26                            | 0.28 | 0.27 |
| 2002 | 7 (0.1)                   | 22 (0.3) | 29 (0.2) | 3.1             | 25 (0.4)                     | 71 (1.1) | 96 (0.8)        | 2.8 | 0.28                            | 0.31 | 0.30 |
| 2003 | 6 (0.1)                   | 20 (0.3) | 26 (0.2) | 3.3             | 20 (0.4)                     | 81 (1.3) | 101 (0.9)       | 4.1 | 0.30                            | 0.25 | 0.26 |
| 2004 | 5 (0.09)                  | 14 (0.2) | 19 (0.2) | 2.8             | 24 (0.4)                     | 68 (1.1) | 92 (0.8)        | 2.8 | 0.21                            | 0.21 | 0.21 |
| 2005 | 6 (0.1)                   | 25 (0.4) | 31 (0.3) | 4.2             | 21 (0.4)                     | 79 (1.3) | 100 (0.9)       | 3.8 | 0.29                            | 0.32 | 0.31 |
| 2006 | 4 (0.07)                  | 14 (0.2) | 18 (0.2) | 3.5             | 15 (0.3)                     | 49 (0.8) | 64 (0.6)        | 3.3 | 0.27                            | 0.29 | 0.28 |
| 2007 | 3 (0.05)                  | 14 (0.2) | 17 (0.1) | 4.7             | 26 (0.5)                     | 63 (1.0) | 89 (0.8)        | 2.4 | 0.12                            | 0.22 | 0.19 |
| 2008 | 0 (0)                     | 19 (0.3) | 19 (0.2) | –               | 13 (0.2)                     | 66 (1.1) | 79 (0.7)        | 5.1 | 0.00                            | 0.29 | 0.24 |
| 2009 | 3 (0.06)                  | 19 (0.3) | 22 (0.2) | 6.3             | 14 (0.3)                     | 75 (1.3) | 89 (0.8)        | 5.4 | 0.21                            | 0.25 | 0.25 |
| 2010 | 3 (0.05)                  | 17 (0.3) | 20 (0.2) | 5.7             | 18 (0.3)                     | 75 (1.2) | 93 (0.8)        | 4.2 | 0.17                            | 0.23 | 0.22 |
| 2011 | 4 (0.07)                  | 16 (0.3) | 20 (0.2) | 4.0             | 17 (0.3)                     | 67 (1.1) | 84 (0.7)        | 3.9 | 0.24                            | 0.24 | 0.24 |
| 2012 | 0 (0)                     | 14 (0.2) | 14 (0.1) | –               | 23 (0.4)                     | 66 (1.0) | 89 (0.7)        | 2.9 | 0.00                            | 0.21 | 0.16 |
| 2013 | 3 (0.05)                  | 14 (0.2) | 17 (0.1) | 4.7             | 16 (0.3)                     | 49 (0.8) | 65 (0.5)        | 3.1 | 0.19                            | 0.29 | 0.26 |
| 2014 | 3 (0.05)                  | 16 (0.3) | 19 (0.2) | 5.3             | 15 (0.3)                     | 47 (0.8) | 62 (0.5)        | 3.1 | 0.20                            | 0.34 | 0.31 |

**Supplementary Table 3.** Distribution of death certificates with musculoskeletal disorders / rheumatoid arthritis as underlying and multiple cause of death, by sex and age.

|              | Musculoskeletal disorders |       |      |       |               | Rheumatoid arthritis |      |     |       |               |
|--------------|---------------------------|-------|------|-------|---------------|----------------------|------|-----|-------|---------------|
|              | UCD                       | Rate  | MCD  | Rate  | UCD/MCD ratio | UCD                  | Rate | MCD | Rate  | UCD/MCD ratio |
| <b>Men</b>   |                           |       |      |       |               |                      |      |     |       |               |
| 20-49 years  | 8                         | 0.2   | 29   | 0.7   | 0.28          | 0                    | 0.0  | 0   | 0.0   | -             |
| 50-59 years  | 16                        | 1.2   | 56   | 4.3   | 0.29          | 1                    | 0.2  | 2   | 0.2   | 0.5           |
| 60-69 years  | 47                        | 4.3   | 192  | 17.6  | 0.24          | 11                   | 1.3  | 51  | 4.7   | 0.22          |
| 70-79 years  | 90                        | 12.8  | 419  | 59.4  | 0.21          | 21                   | 3.8  | 98  | 13.9  | 0.21          |
| 80-89 years  | 112                       | 33.0  | 826  | 243.2 | 0.14          | 22                   | 11.8 | 156 | 45.9  | 0.14          |
| 90+ years    | 30                        | 63.3  | 230  | 485.3 | 0.13          | 7                    | 21.1 | 30  | 63.3  | 0.23          |
| <b>Women</b> |                           |       |      |       |               |                      |      |     |       |               |
| 20-49 years  | 18                        | 0.5   | 42   | 1.1   | 0.43          | 5                    | 0.1  | 9   | 0.2   | 0.56          |
| 50-59 years  | 30                        | 2.3   | 74   | 5.7   | 0.41          | 7                    | 0.5  | 18  | 1.4   | 0.39          |
| 60-69 years  | 68                        | 6.0   | 257  | 22.8  | 0.26          | 22                   | 2.0  | 96  | 8.5   | 0.23          |
| 70-79 years  | 197                       | 23.2  | 796  | 93.9  | 0.25          | 81                   | 9.6  | 353 | 41.6  | 0.23          |
| 80-89 years  | 338                       | 60.1  | 1812 | 322.4 | 0.19          | 131                  | 23.3 | 537 | 95.5  | 0.24          |
| 90+ years    | 172                       | 129.9 | 999  | 754.3 | 0.17          | 61                   | 46.1 | 162 | 122.3 | 0.38          |
| <b>All</b>   |                           |       |      |       |               |                      |      |     |       |               |
| 20-49 years  | 26                        | 0.3   | 71   | 0.9   | 0.37          | 5                    | 0.1  | 9   | 0.1   | 0.56          |
| 50-59 years  | 46                        | 1.8   | 130  | 5.0   | 0.35          | 8                    | 0.3  | 20  | 0.8   | 0.40          |
| 60-69 years  | 115                       | 5.2   | 449  | 20.2  | 0.26          | 33                   | 1.6  | 147 | 6.6   | 0.22          |
| 70-79 years  | 287                       | 18.5  | 1215 | 78.2  | 0.24          | 102                  | 7.0  | 451 | 29.0  | 0.23          |
| 80-89 years  | 450                       | 49.9  | 2638 | 292.6 | 0.17          | 153                  | 19.0 | 693 | 76.9  | 0.22          |
| 90+ years    | 202                       | 112.3 | 1229 | 683.4 | 0.16          | 68                   | 39.5 | 192 | 106.8 | 0.35          |

Rate per 100,000 population; UCD: underlying cause of death; MCD: any mention on death certificate.

Supplementary Figure 1. Distribution of death certificates according to the number of causes.

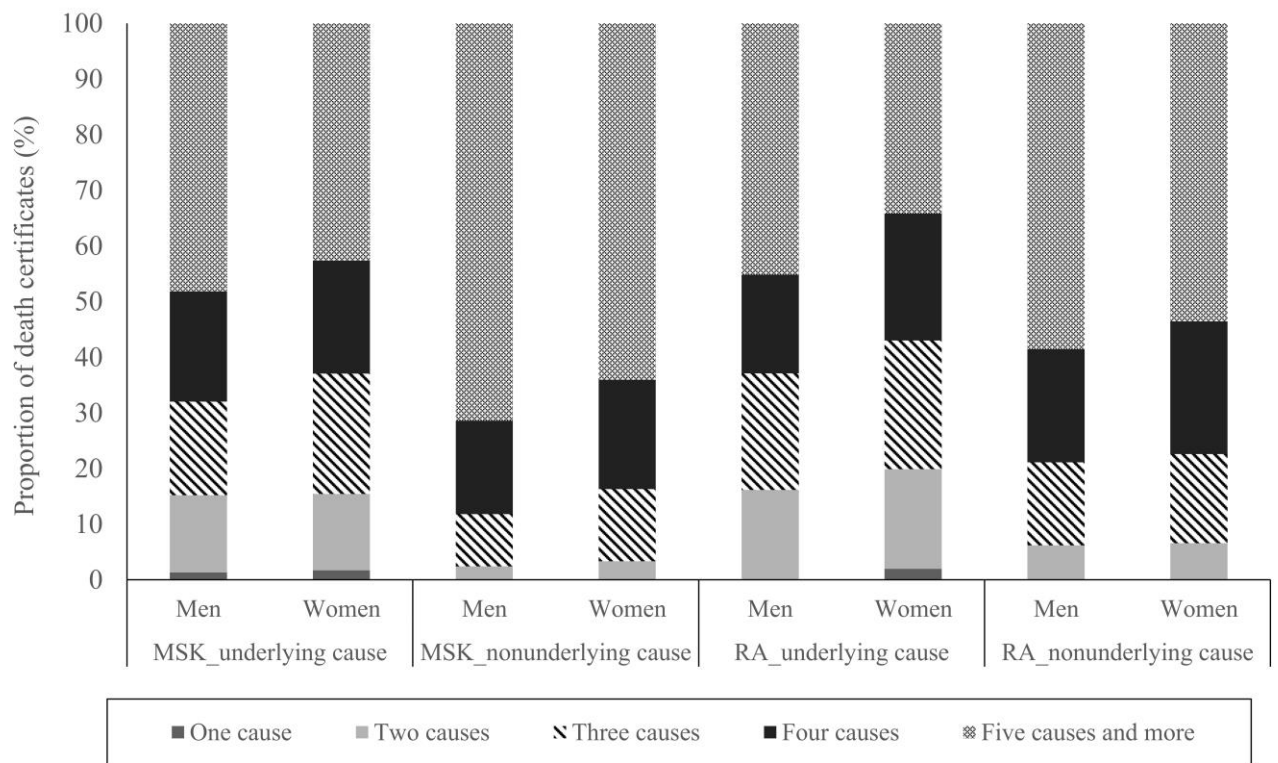

Supplementary Figure 2. Mean number of causes on death certificates with any/no mention of musculoskeletal disorders/rheumatoid arthritis

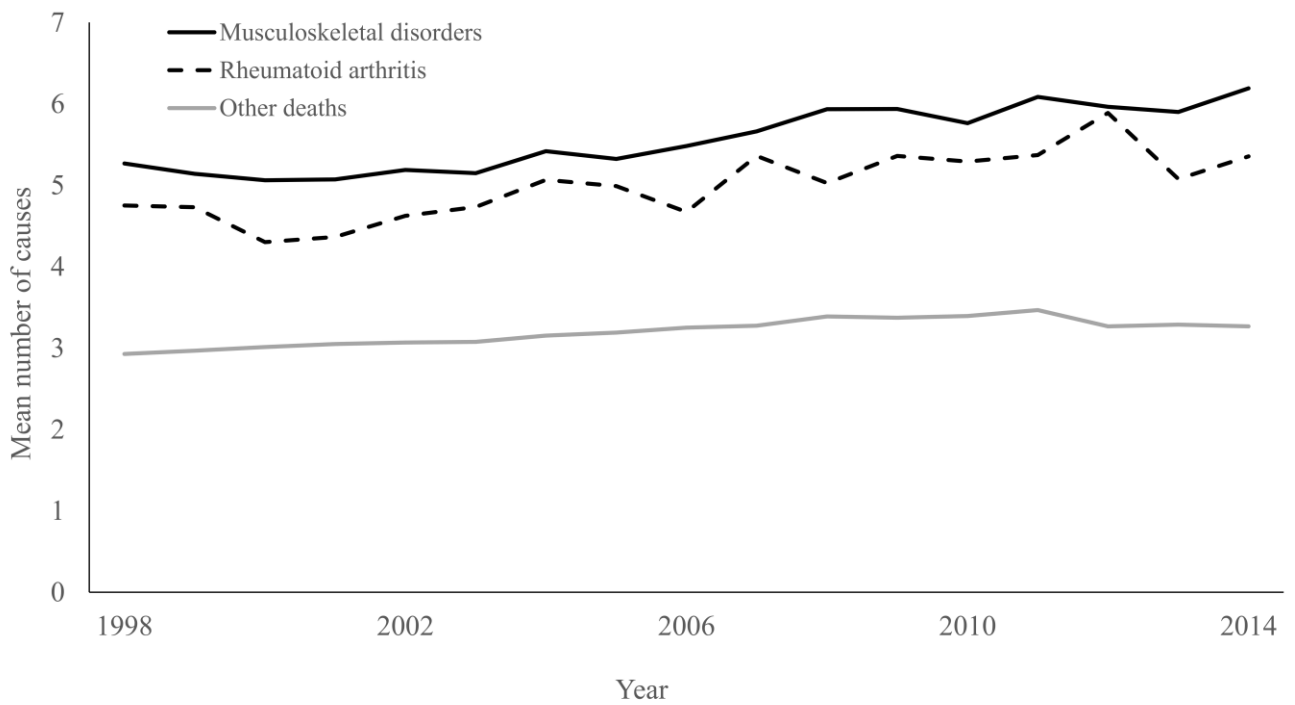

**Supplementary Figure 3. Age-specific mortality rate of musculoskeletal disorders (any mention on death certificate)**

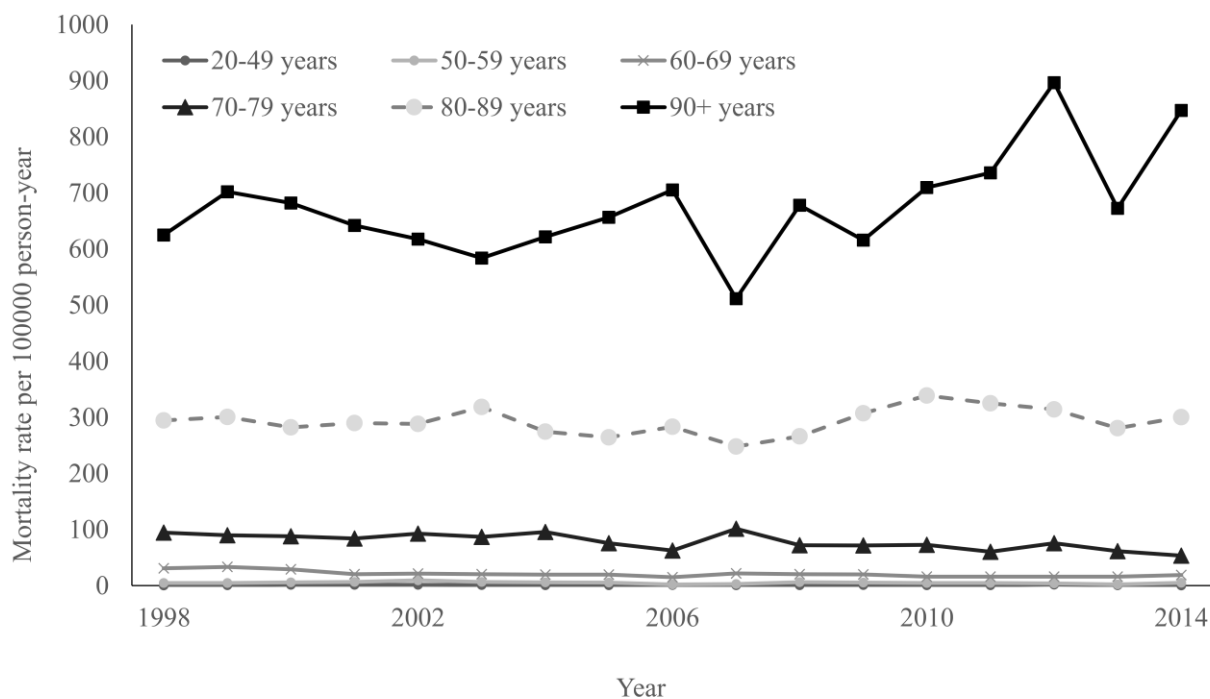

**Supplementary Figure 4. Age-specific mortality rate of rheumatoid arthritis (any mention on death certificate)**

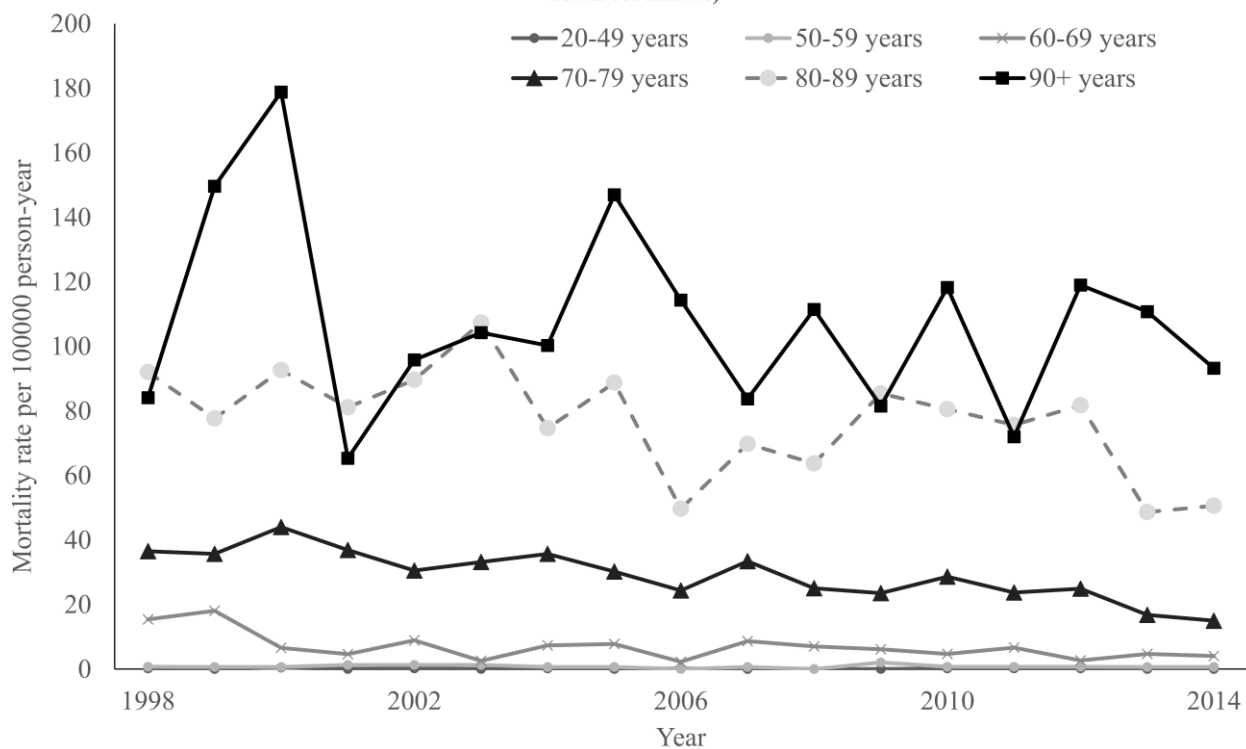

Supplement: 161219DataSuppl.pdf [file 161219DataSuppl.pdf]
